# Supplementary material for: Neuroticism alters the transcriptome of the frontal cortex to contribute to the cognitive decline and onset of Alzheimer’s disease
Source: PubMed Central journal article supplement (PMC7904919; doi:10.1038/s41398-021-01253-6), 2021-02-24

**A**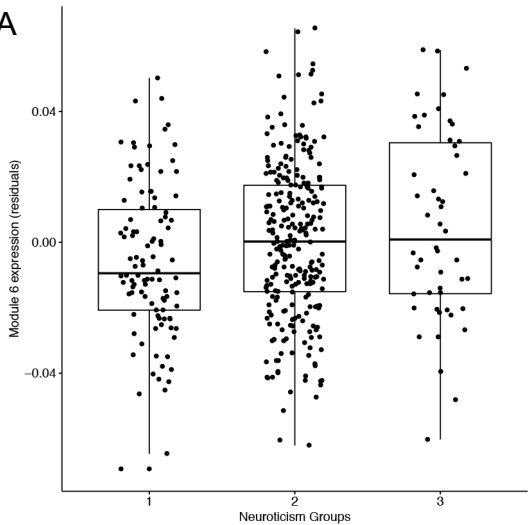**B**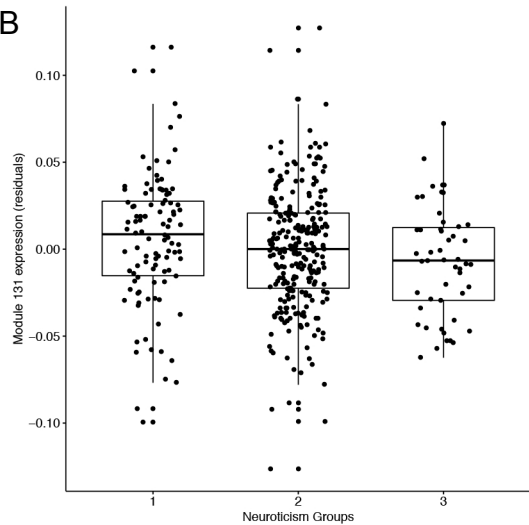

Supplement: 41398_2021_1253_MOESM3_ESM.pdf [file 41398_2021_1253_MOESM3_ESM.pdf]
